# Supplementary material for: Growth Inhibitory Effects of Ester Derivatives of Menahydroquinone-4, the Reduced Form of Vitamin K2(20), on All-Trans Retinoic Acid-Resistant HL60 Cell Line
Source: MDPI journal article supplement (doi:10.3390/pharmaceutics13050758), 2021-05-20
Supplement: s1 [file s1]

# Supplementary Materials: Growth Inhibitory Effects of Ester Derivatives of Menahydroquinone-4, the Reduced Form of Vitamin K<sub>2(20)</sub>, on All-Trans Retinoic Acid-Resistant HL60 Cell Line

Hirofumi Yamakawa, Shuichi Setoguchi, Shotaro Goto, Daisuke Watase, Kazuki Terada, Nami Nagata-Akaho, Erina Toki, Mitsuhsa Koga, Kazuhisa Matsunaga, Yoshiharu Karube and Jiro Takata

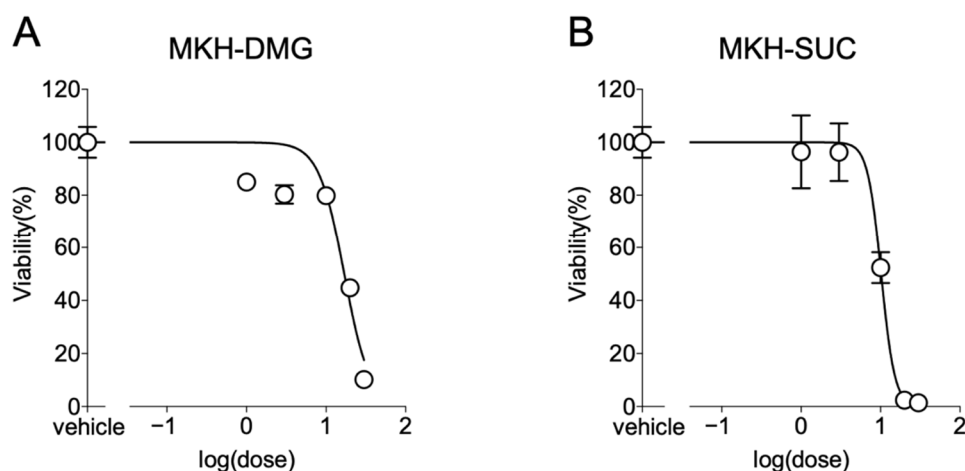

**Figure S1.** Inhibitory effects of MKH derivatives on the viability of NB-4 cells. The human promyelocytic cell lines NB-4 were provided by Cell Line Service (Eppelheim, German). The cells were treated with 1–30  $\mu$ M MKH-DMG (**A**) or MKH-SUC (**B**) for 72 h. This experiment was performed as described in Materials and Methods 2.3. Error bars indicate mean  $\pm$ SD ( $n = 3$ ).

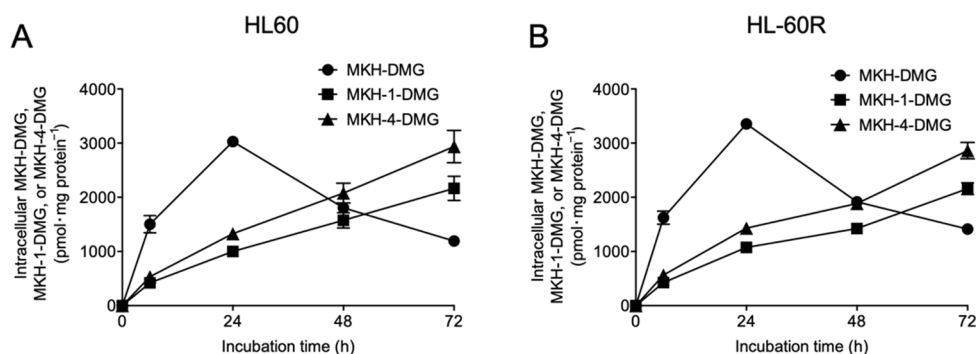

**Figure S2.** Intracellular concentration of MKH-esters (1,4-bis-ester, 1-monoester, and 4-monoester) in HL60 (**A**) and HL-60R (**B**) cells treated with 5  $\mu$ M MKH-DMG up to 72 h. Error bars indicate mean  $\pm$ SD ( $n = 3$ ).

**Table S1.** Area under the curve over 72 h ( $AUC_{0-72\text{ h}}$ ) of intracellular concentrations of MKH-esters (1,4-bis-ester, 1-monoester, and 4-monoester) in HL60 and HL-60R treated with 5  $\mu\text{M}$  MKH-DMG.

| Intracellular Concentrations of MKH-Esters | $AUC_{0-72\text{ h}}^a$<br>( $\text{nmol}\cdot\text{h}\cdot\text{mg protein}^{-1}$ ) |                 |
|--------------------------------------------|--------------------------------------------------------------------------------------|-----------------|
|                                            | HL60                                                                                 | HL-60R          |
| MKH-DMG                                    | $139 \pm 5.54$                                                                       | $153 \pm 3.08$  |
| MKH-1-DMG                                  | $89.9 \pm 6.15$                                                                      | $87.8 \pm 4.21$ |
| MKH-4-DMG                                  | $119 \pm 7.95$                                                                       | $116 \pm 5.65$  |

<sup>a</sup> values are shown as Mean  $\pm$  SD ( $n = 3$ ).
